# Supplementary material
Source: MDPI journal article supplement (https://www.mdpi.com/2071-1050/14/16/9818)
Supplement: s1 [file s1]

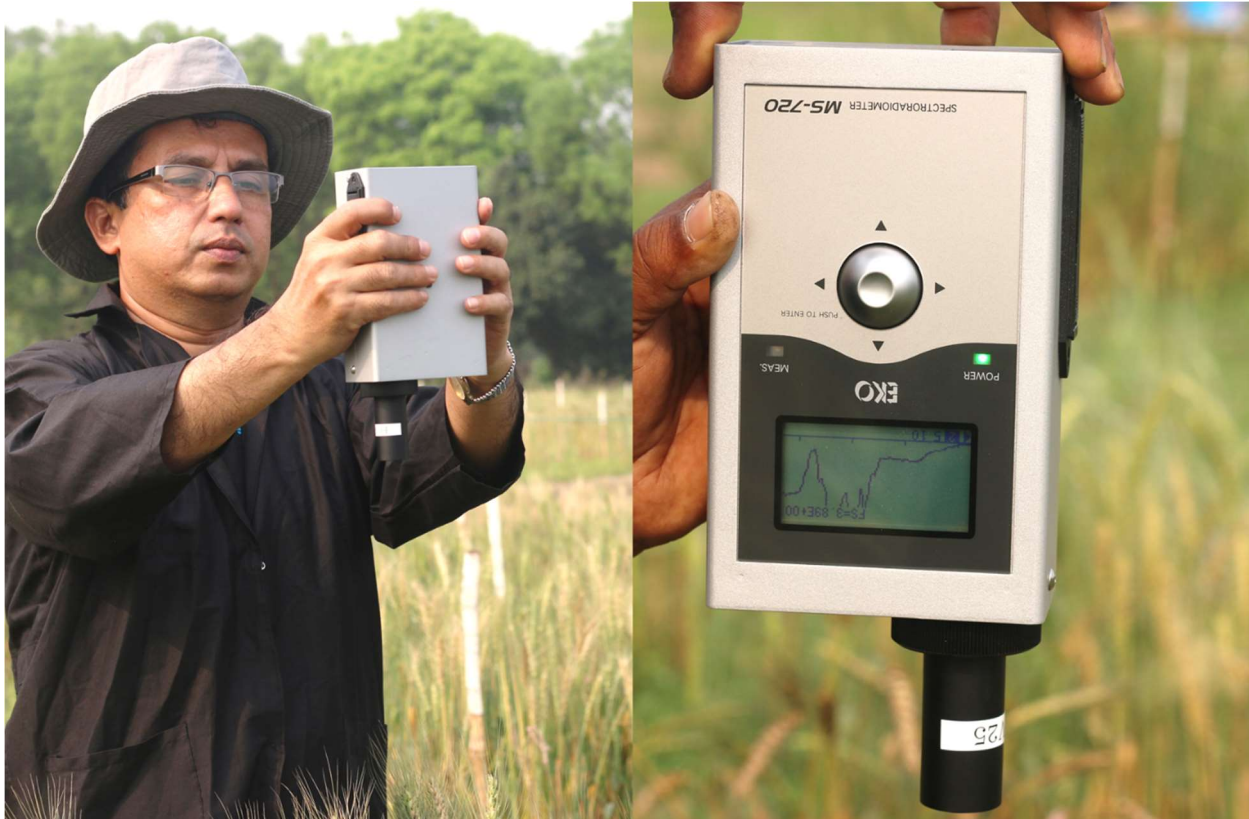

**Figure S1.** Measurement of canopy reflectance using a multispectral radiometer.

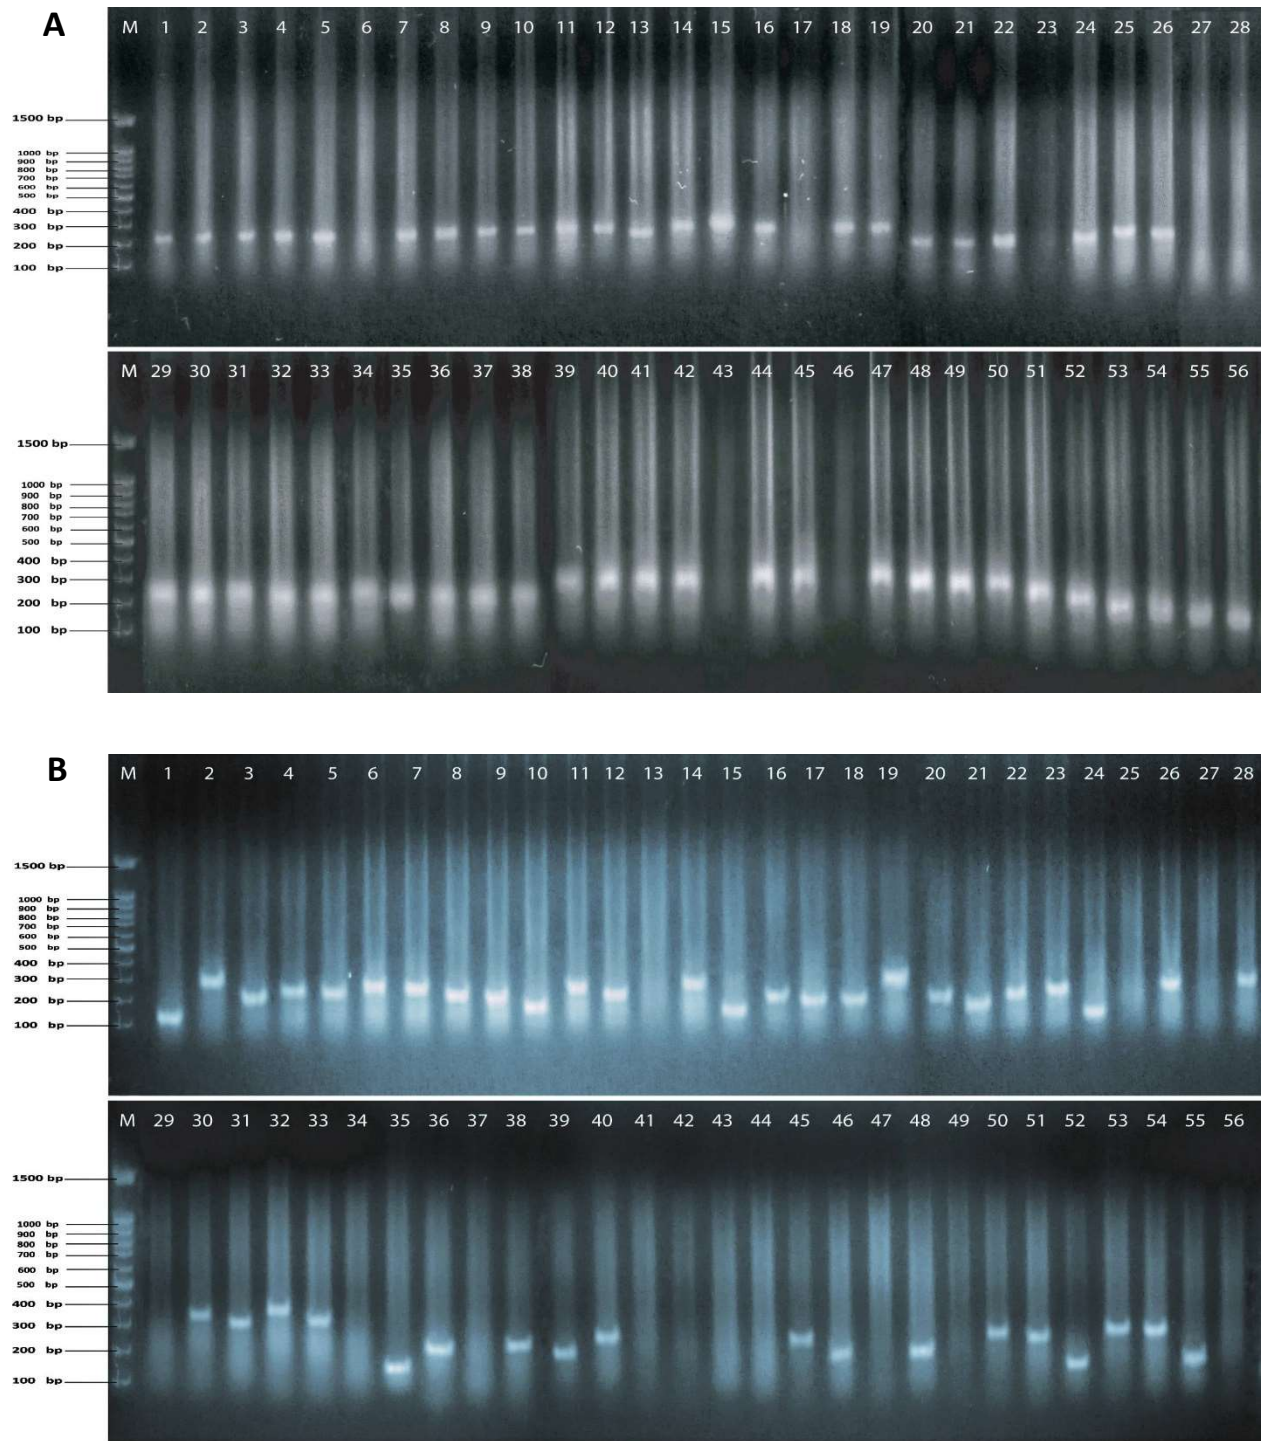

**Figure S2.** The SSR marker profiles of bread wheat genotypes using *wmc177* (A) and *wms292* (B) SSR primers. M indicates molecular weight. A list of 56 wheat genotypes is present in the supplementary **Table S1**.

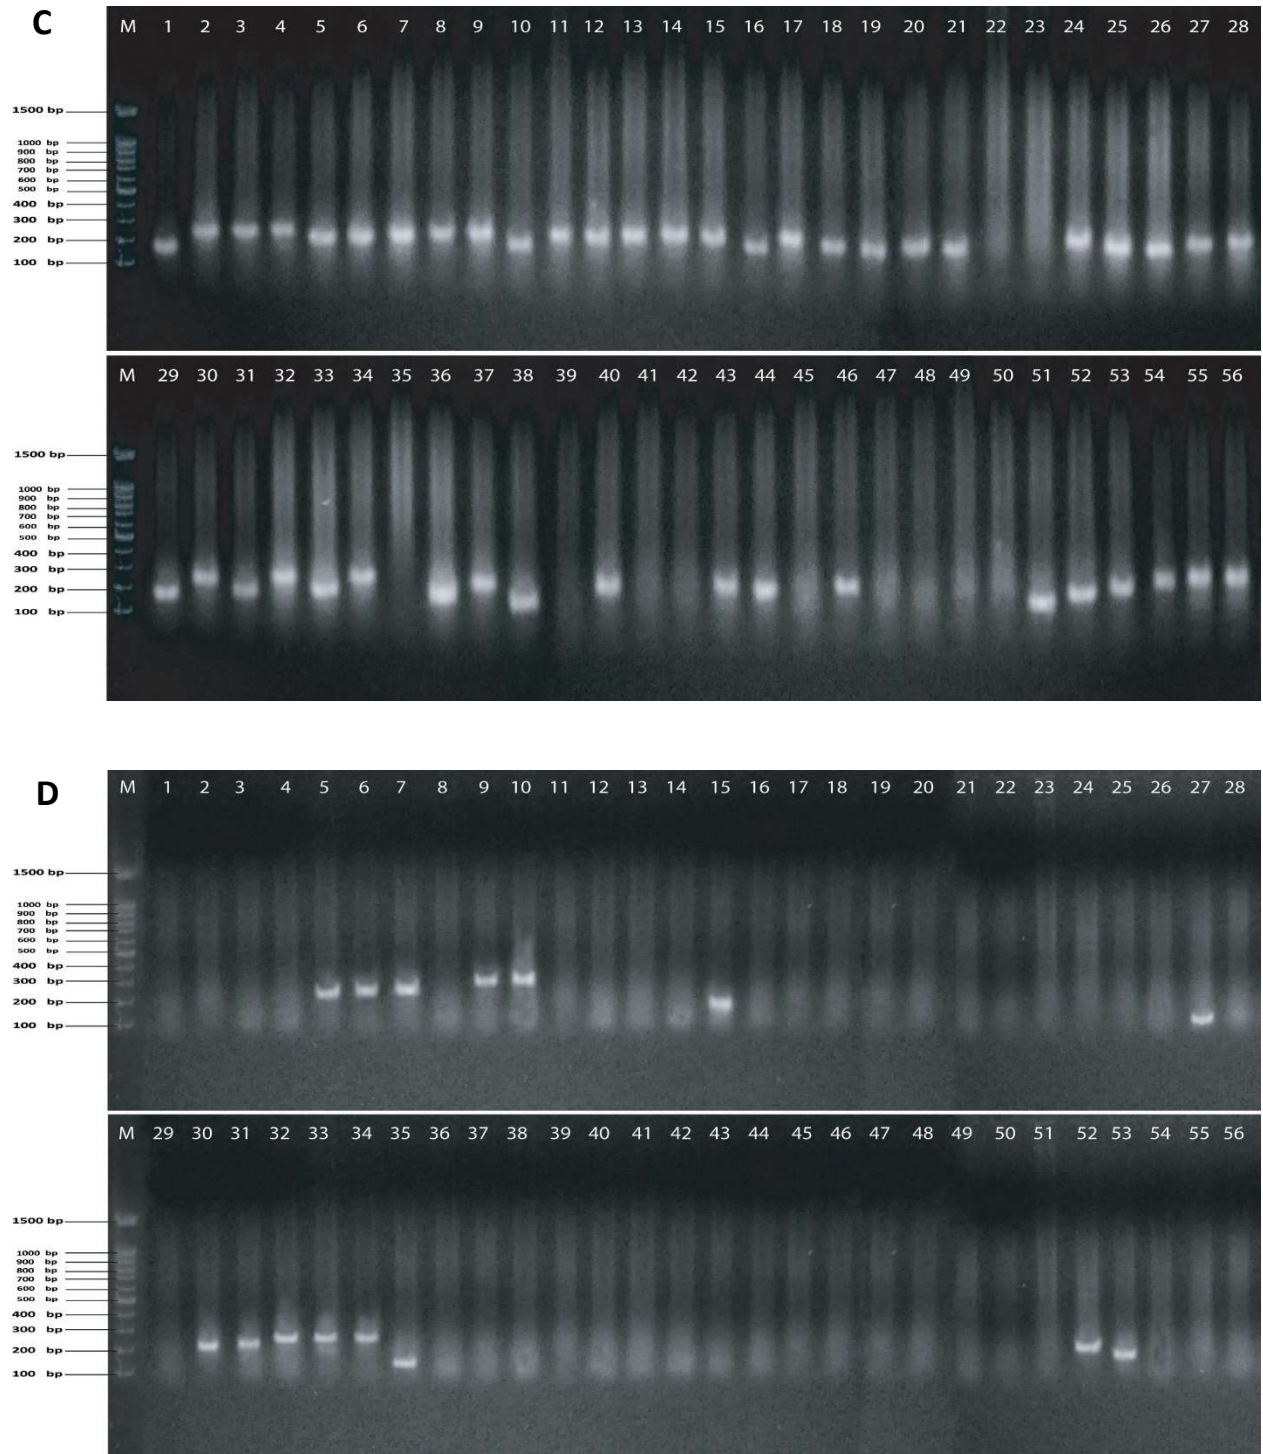

**Figure S2 (contd.).** The SSR marker profiles of bread wheat genotypes using *wms260* (C) and *wms186* (D) SSR primers. M indicates molecular weight. A list of 56 wheat genotypes is present in the supplementary **Table S1**.



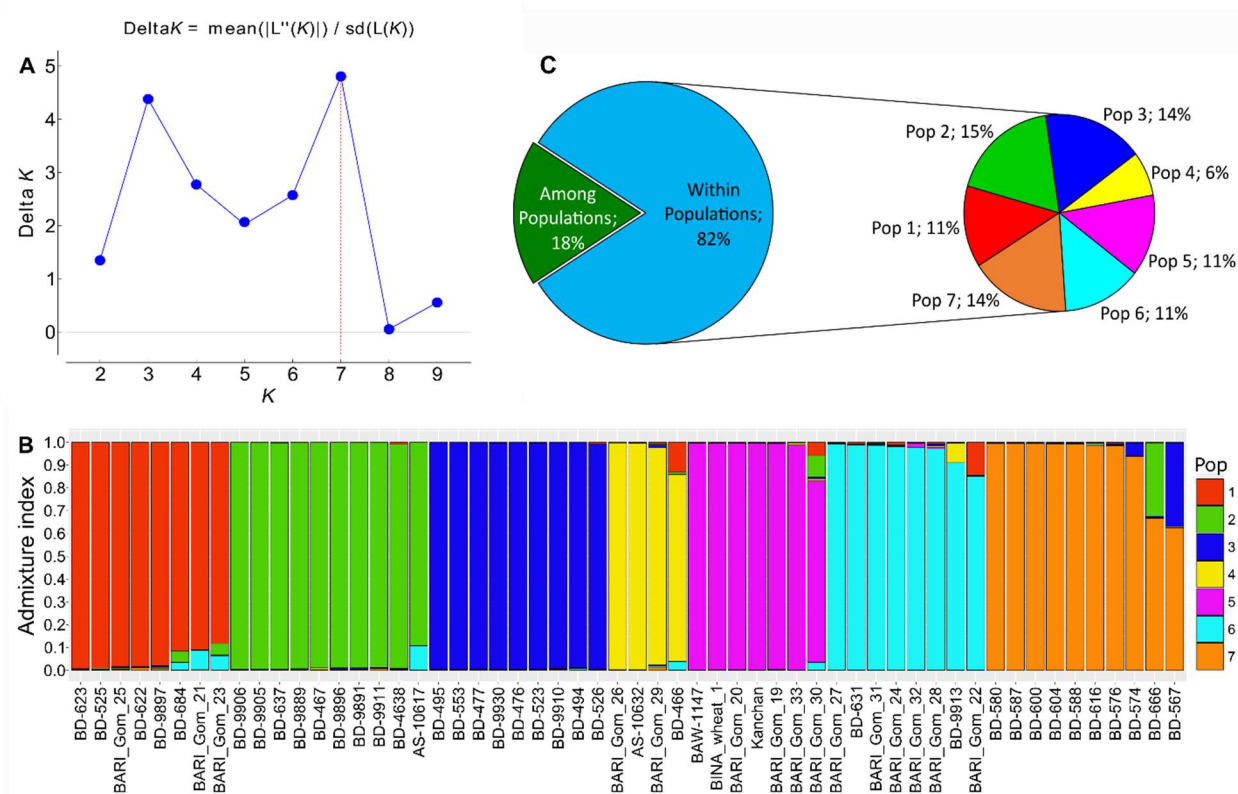

**Figure S3.** A. The peak of  $\Delta K = 7$  determines the number of populations in our study, B. Estimated population structure of 56 bread wheat genotypes with 25 SSR markers for  $\Delta K = 7$ , and C. The population obtained by the STRUCTURE-based method was used to analyse the molecular variance (AMOVA) of 56 wheat genotypes.

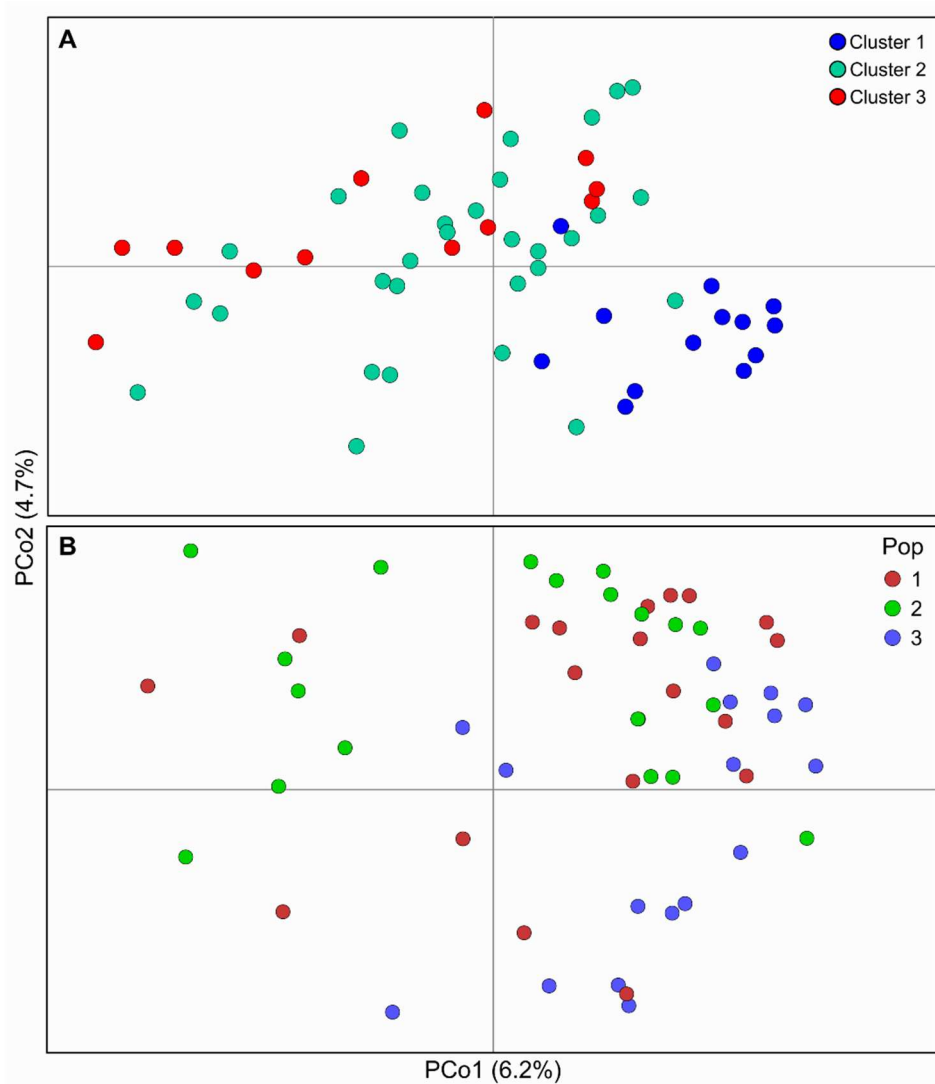

**Figure S4.** Principal coordinate analysis (PCoA) of SSR marker allelic data for 56 wheat genotypes with respect to phenotypic clusters (A), and model-based subpopulations (B). Individuals, clusters, and populations differences are visualized in the figure. Individuals from different clusters and populations are intermixed across the coordinates.

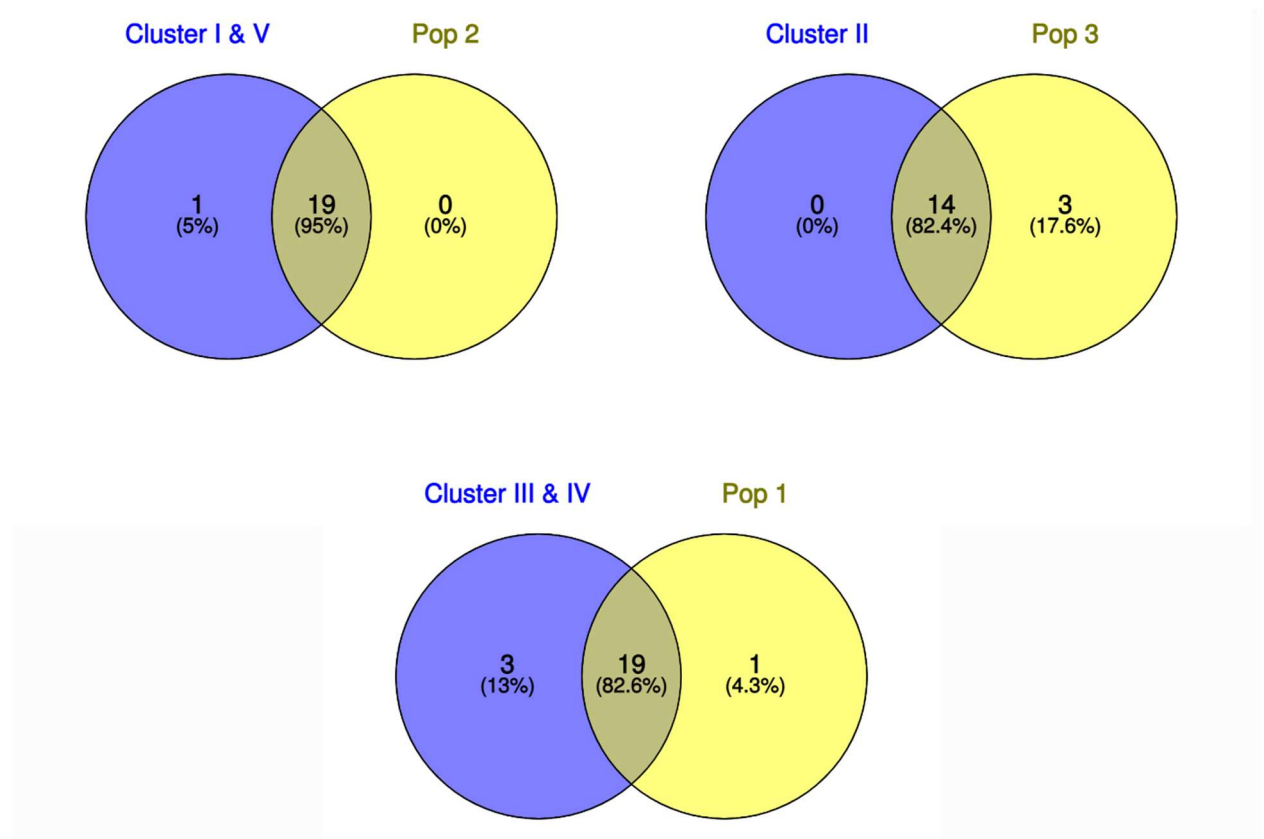

**Figure S5.** Venn diagram showing co-linearity between SSR-based NJ clusters and model-based populations. Overall, 86.7% co-linearity exists between NJ clusters and extracted model-based populations when  $\Delta K = 3$ .

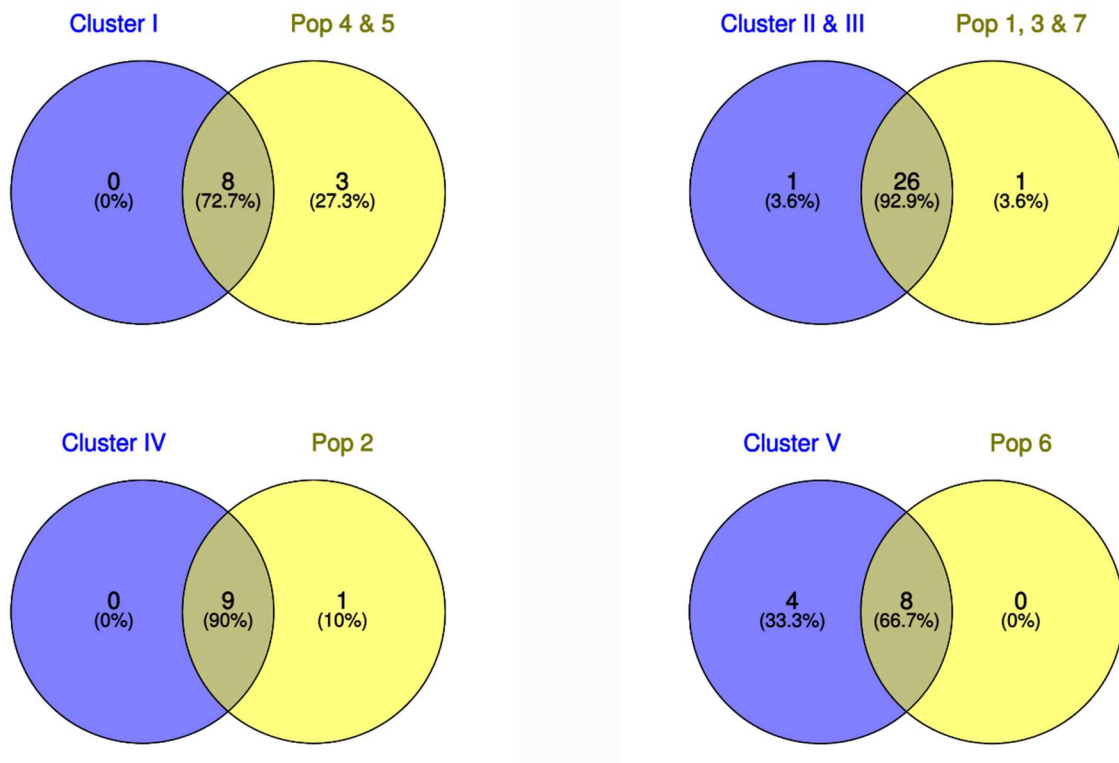

**Figure S6.** Venn diagram showing co-linearity between SSR-based NJ clusters and model-based populations. Overall, 80.6% co-linearity exists between NJ clusters and extracted model-based populations when  $\Delta K = 7$ .

**Table S1.** List of wheat genotypes used in the exploratory study

| Sl. No. | Genotype    | Source     | Type          | Pedigree/Collected from                                                      |
|---------|-------------|------------|---------------|------------------------------------------------------------------------------|
| 1       | AS-10617    | ACI Seed   | Mutant        | BARI Gom 25; mutagen: 1% EMS                                                 |
| 2       | AS-10632    | ACI Seed   | Mutant        | BARI Gom 25; mutagen: 1% EMS                                                 |
| 3       | BARI Gom 19 | BWMRI      | Variety       | NAC/VEE (NL 560)                                                             |
| 4       | BARI Gom 20 | BWMRI      | Variety       | TURACO/CHIL                                                                  |
| 5       | BARI Gom 21 | BWMRI      | Variety       | MRNG/BVC//BLO/PVN/3/PJB-81                                                   |
| 6       | BARI Gom 22 | BWMRI      | Variety       | KAN/6/COQ/F61.70//CNDR/3/OLN/4/PHO/5/MRNG/ALDAN//CNO                         |
| 7       | BARI Gom 23 | BWMRI      | Variety       | NL297*2/LR25                                                                 |
| 8       | BARI Gom 24 | BWMRI      | Variety       | G. 162/BL 1316//NL 297                                                       |
| 9       | BARI Gom 25 | BWMRI      | Variety       | ZSH 12/HLB 19//2*NL297                                                       |
| 10      | BARI Gom 26 | BWMRI      | Variety       | ICTAL 123/3/RAWAL 87//VEE/HD 2285                                            |
| 11      | BARI Gom 27 | BWMRI      | Variety       | WAXWING*2/VIVISTI                                                            |
| 12      | BARI Gom 28 | BWMRI      | Variety       | CHIL/2*STAR/4/BOW/CROW//BUC/PVN/3/2*VEE#10                                   |
| 13      | BARI Gom 29 | BWMRI      | Variety       | SOURAV/7/KLAT/SOREN//PSN/3/BOW/4/VEE#5. 10/5/CNO 67/MFD// MON/3/SERI/6/NL297 |
| 14      | BARI Gom 30 | BWMRI      | Variety       | BAW 677/Bijoy                                                                |
| 15      | BARI Gom 31 | BWMRI      | Variety       | KAL/BB/YD/3/PASTOR                                                           |
| 16      | BARI Gom 32 | BWMRI      | Variety       | SHATABDI/GOURAB                                                              |
| 17      | BARI Gom 33 | BWMRI      | Variety       | KACHU/SOLALA                                                                 |
| 18      | BAW-1147    | BWMRI      | Advanced line | WRS, Gazipur                                                                 |
| 19      | BD-4638     | PGRC, BARI | Accession     | -                                                                            |
| 20      | BD-466      | PGRC, BARI | Accession     | -                                                                            |
| 21      | BD-467      | PGRC, BARI | Accession     | -                                                                            |
| 22      | BD-476      | PGRC, BARI | Accession     | -                                                                            |
| 23      | BD-477      | PGRC, BARI | Accession     | -                                                                            |
| 24      | BD-494      | PGRC, BARI | Accession     | -                                                                            |
| 25      | BD-495      | PGRC, BARI | Accession     | -                                                                            |
| 26      | BD-523      | PGRC, BARI | Accession     | -                                                                            |
| 27      | BD-525      | PGRC, BARI | Accession     | -                                                                            |
| 28      | BD-526      | PGRC, BARI | Accession     | -                                                                            |
| 29      | BD-553      | PGRC, BARI | Accession     | -                                                                            |
| 30      | BD-567      | PGRC, BARI | Accession     | -                                                                            |
| 31      | BD-574      | PGRC, BARI | Accession     | -                                                                            |
| 32      | BD-576      | PGRC, BARI | Accession     | -                                                                            |
| 33      | BD-580      | PGRC, BARI | Accession     | -                                                                            |



| Sl. No. | Genotype     | Source     | Type      | Pedigree/Collected from |
|---------|--------------|------------|-----------|-------------------------|
| 34      | BD-587       | PGRC, BARI | Accession | -                       |
| 35      | BD-588       | PGRC, BARI | Accession | -                       |
| 36      | BD-600       | PGRC, BARI | Accession | -                       |
| 37      | BD-604       | PGRC, BARI | Accession | -                       |
| 38      | BD-616       | PGRC, BARI | Accession | -                       |
| 39      | BD-622       | PGRC, BARI | Accession | -                       |
| 40      | BD-623       | PGRC, BARI | Accession | -                       |
| 41      | BD-631       | PGRC, BARI | Accession | -                       |
| 42      | BD-637       | PGRC, BARI | Accession | -                       |
| 43      | BD-666       | PGRC, BARI | Accession | -                       |
| 44      | BD-684       | PGRC, BARI | Accession | -                       |
| 45      | BD-9889      | PGRC, BARI | Accession | RARS, Ishurdi           |
| 46      | BD-9891      | PGRC, BARI | Accession | RARS, Ishurdi           |
| 47      | BD-9896      | PGRC, BARI | Accession | RARS, Ishurdi           |
| 48      | BD-9897      | PGRC, BARI | Accession | RARS, Ishurdi           |
| 49      | BD-9905      | PGRC, BARI | Accession | RARS, Ishurdi           |
| 50      | BD-9906      | PGRC, BARI | Accession | RARS, Ishurdi           |
| 51      | BD-9910      | PGRC, BARI | Accession | RARS, Ishurdi           |
| 52      | BD-9911      | PGRC, BARI | Accession | RARS, Ishurdi           |
| 53      | BD-9913      | PGRC, BARI | Accession | RARS, Ishurdi           |
| 54      | BD-9930      | PGRC, BARI | Accession | RARS, Ishurdi           |
| 55      | BINA wheat 1 | BINA       | Variety   | L-880-43                |
| 56      | Kanchan      | BWMRI      | Variety   | UP301/C306              |

ACI- Advanced Chemical Industries; BARI- Bangladesh Agricultural Research Institute; BINA- Bangladesh Institute of Nuclear Agriculture; BWMRI- Bangladesh Wheat and Maize Research Institute; PGRC- Plant Genetic Resource Center; RARS- Regional Agricultural Research Station; WRS- Wheat Research Station.

**Table S2.** Details of SSR primers used in this study

| Sl. No. | Marker | Chr. Location          | Chr. Arm | Marker Sequence                                                        | Motif          | Product Size (bp) | AT (°C) | Reference                     |
|---------|--------|------------------------|----------|------------------------------------------------------------------------|----------------|-------------------|---------|-------------------------------|
| 1       | wms136 | 1A                     | S        | F- GAC AGC ACC TTG CCC TTT G<br>R- CAT CGG CAA CAT GCT CAT C           | CT             | 296               | 60      | Somers <i>et al.</i> , (2004) |
| 2       | wms11  | 1B                     | L, S     | F- GGA TAG TCA GAC AAT TCT TGT G<br>R- GTG AAT TGT GTC TTG TAT GCT TCC | TA,CATA, CA,TA | 196               | 61      | Somers <i>et al.</i> , (2004) |
| 3       | wmc179 | 1D (2A, 4A, 6A,6B, 7A) | L        | F- CAT GGT GGC CAT GAG TGG AGG T<br>R- CAT GAT CTT GCG TGT GCG TAG G   | GA             | 184               | 61      | Somers and Isaac (2004)       |
| 4       | wms337 | 1D                     | S        | F- CCT CTT CCT CCC TCA CTT AGC<br>R- TGC TAA CTG GCC TTT GCC           | CT,CACT,CA     | 183               | 55      | Dodig <i>et al.</i> , (2010)  |
| 5       | wmc177 | 2A                     | S        | F- AGG GCT CTC TTT AAT TCT TGC T<br>R- GGT CTA TCG TAA TCC ACC TGT A   | CA             | 184               | 51      | Somers and Isaac (2004)       |
| 6       | wms304 | 2A(5A)                 | S        | F- AGG AAA CAG AAA TAT CGC GG<br>R- AGG ACT GTG GGG AAT GAA TG         | CT             | 217               | 55      | Somers <i>et al.</i> , (2004) |
| 7       | wms257 | 2B                     | S        | F- AGA GTG CAT GGT GGG ACG<br>R- CCA AGA CGA TGC TGA AGT CA            | GT             | 192               | 60      | Somers <i>et al.</i> , (2004) |
| 8       | wms30  | 2D                     | L        | F- ATC TTA GCA TAG AAG GGA GTG GG<br>R- TTC TGC ACC CTG GGT GAT TGC    | AT,GT          | 206               | 60      | Somers <i>et al.</i> , (2004) |
| 9       | wms484 | 2D                     | S        | F- ACA TCG CTC TTC ACA AAC CC<br>R- AGT TCC GGT CAT GGC TAG G          | CT             | 145               | 55      | Somers <i>et al.</i> , (2004) |
| 10      | wms369 | 3A                     | S        | F- CTG CAG GCC ATG ATG ATG<br>R- ACC GTG GGT GTT GTG AGC               | CT,T,CT        | 188               | 60      | Somers <i>et al.</i> , (2004) |
| 11      | wms389 | 3B                     | S        | F- ATC ATG TCG ATC TCC TTG ACG<br>R- TGC CAT GCA CAT TAG CAG AT        | CT,GT          | 130               | 60      | Somers <i>et al.</i> , (2004) |
| 12      | wms161 | 3D (4A)                | S        | F- GAT CGA GTG ATG GCA GAT GG<br>R- TGT GAA TTA CTT GGA CGT GG         | CT             | 154               | 60      | Somers <i>et al.</i> , (2004) |
| 13      | wms165 | 4A                     | S        | F- TGC AGT GGT CAG ATG TTT CC<br>R- CTT TTC TTT CAG ATT GCG CC         | GA             | 199               | 60      | Somers <i>et al.</i> , (2004) |
| 14      | wms149 | 4B                     | L        | F- CAT TGT TTT CTG CCT CTA GCC<br>R- CTA GCA TCG AAC CTG AAC AAG       | GA imp         | 161               | 55      | Somers <i>et al.</i> , (2004) |
| 15      | wms375 | 4B                     | L        | F- ATT GGC GAC TCT AGC ATA TAC G<br>R- GGG ATG TCT GTT CCA TCT TAG C   | CA             | 156               | 55      | Lowe <i>et al.</i> , (2011)   |

| Sl. No. | Marker  | Chr. Location | Chr. Arm | Marker Sequence                                                                    | Motif    | Product Size (bp) | AT (°C) | Reference                        |
|---------|---------|---------------|----------|------------------------------------------------------------------------------------|----------|-------------------|---------|----------------------------------|
| 16      | wms192  | 4D (4A, 4B)   | L        | F- GGT TTT CTT TCA GAT TGC GC<br>R- CGT TGT CTA ATC TTG CCT TGC                    | CT       | 191               | 60      | Somers <i>et al.</i> , (2004)    |
| 17      | wms186  | 5A            | L        | F- GCA GAG CCT GGT TCA AAA AG<br>R- CGC CTC TAG CGA GAG CTA TG                     | GA       | 140               | 60      | Dodig <i>et al.</i> , (2010)     |
| 18      | wms118  | 5B (4A)       | L, S     | F- GAT GGT GCC ACT TGA GCA TG<br>R- GAT TGT CAA ATG GAA CAC CC                     | CA       | 110               | 60      | Lowe <i>et al.</i> , (2011)      |
| 19      | wms292  | 5D (5A)       | L        | F- TCA CCG TGG TCA CCG AC<br>R- CCA CCG AGC CGA TAA TGT AC                         | CT       | 220               | 60      | Lowe <i>et al.</i> , (2011)      |
| 20      | wms169  | 6A            | L        | F- ACC ACT GCA GAG AAC ACA TAC G<br>R- GTG CTC TGC TCT AAG TGT GGG                 | GA       | 196               | 60      | Somers <i>et al.</i> , (2004)    |
| 21      | psp3071 | 6A            | L        | F- CGT GCC CTA CAC CTC CTT TTC TCT C<br>R- TCC GTA CAT ACT CCG GGA GAC C           | TC       | 153               | 61      | Stepheson <i>et al.</i> , (1998) |
| 22      | wmc105  | 6B            | S        | F- AAT GTC ATG CGT GTA GTA GCC A<br>R- AAG CGC ACT TAA CAG AAG AGG G               | GT       | 192               | 61      | Somers and Isaac (2004)          |
| 23      | psp3200 | 6D            | S        | F- GTT CTG AAG ACA TTA CGG ATG<br>R- GAG AAT AGC TGG TTT TGT GG                    | AAG      | 170               | 61      | Olson <i>et al.</i> , (2013)     |
| 24      | barc108 | 7A            | S        | F- GCG GGT CGT TTC CTG GAA ATT CAT CTA A<br>R- GCG AAA TGA TTG GCG TTA CAC CTG TTG | ATT      |                   | 50      | Somers <i>et al.</i> , (2004)    |
| 25      | wmc603  | 7A (1A)       | L        | F- ACA AA CGG TGA CAA TGC AAG GA<br>R- CGC CTC TCT CGT AAG CCT CAA C               |          | 120               | 61      | Somers and Isaac (2004)          |
| 26      | wmc9    | 7A            | L        | F- AAC TAG TCA AAT AGT CGT GTC CG<br>F- GTC AAG TCA TCT GAC TTA ACC CG             |          | 168               | 61      | Somers and Isaac (2004)          |
| 27      | wms260  | 7A            | L, S     | F- GCC CCC TTG CAC AAA TC<br>R- CGC AGC TAC AGG AGG CC                             | GA       | 157               | 55      | Somers <i>et al.</i> , (2004)    |
| 28      | wms130  | 7A (2A, 7B)   | S        | F- AGC TCT GCT TCA CGA GGA AG<br>R- CTC CTC TTT ATA TCG CGT CCC                    | GT       | 113               | 60      | Lowe <i>et al.</i> , (2011)      |
| 29      | wms46   | 7B            | S        | F- GCA CGT GAA TGG ATT GGA C<br>R- TGA CCC AAT AGT GGT GGT CA                      | GA,GC,GA | 187               | 60      | Somers <i>et al.</i> , (2004)    |
| 30      | wms295  | 7D            | S        | F- GTG AAG CAG ACC CAC AAC AC<br>R- GAC GGC TGC GAC GTA GAG                        | GA       | 258               | 60      | Lowe <i>et al.</i> , (2011)      |

## Reference

- Dodig, D.; Zorić, M.; Kobiljski, B.; Šurlan-Momirović, G.; Steve A. Quarrie, S.A. Assessing drought tolerance and regional patterns of genetic diversity among spring and winter bread wheat using simple sequence repeats and phenotypic data. *Crop and Pasture Science* 61, **2010**, 812–824. <https://doi.org/10.1071/CP10001>
- Lowe, I.; Jankuloski, L.; Chao, S.; Chen, X.; See, D.; Dubcovsky, J. Mapping and validation of QTL which confer partial resistance to broadly virulent post-2000 North American races of stripe rust in hexaploid wheat. *Theor Appl Genet* 123, **2011**, 143–157. <https://doi.org/10.1007/s00122-011-1573-0>
- Olson, E.L.; Rouse, M.N.; Pumphrey, M.O.; et al. Introgression of stem rust resistance genes *SrTA10187* and *SrTA10171* from *Aegilops tauschii* to wheat. *Theor Appl Genet* 126, **2013**, 2477–2484. <https://doi.org/10.1007/s00122-013-2148-z>
- Somers, D.J.; Isaac, P. SSRs from the Wheat Microsatellite Consortium. Available at <https://wheat.pw.usda.gov/ggpages/SSR/WMC/> (Accessed on 12 September 2021): 2004.
- Somers, D.J.; Isaac, P.; Edwards, K. A high-density microsatellite consensus map for bread wheat (*Triticum aestivum* L.). *Theor Appl Genet* 109, **2004**, 1105–1114. <https://doi.org/10.1007/s00122-004-1740-7>
- Stephenson, P.; Bryan, G.J.; Kirby, J.; Collins, A.J.; Devos, K.M.; Busso, C.S.; Gale, M.D. Fifty new microsatellite loci for the wheat genetic map. *Theor Appl Genet* 97, **1998**, 946–949.

**Table S3.** Combined analysis of variance (mean square values) across years for mean vegetation indices (VIs), and yield traits of bread wheat genotypes

| Traits | Genotype (G) | Treatment (T) | Year (Y)  | G×T         | G×Y      | T×Y         | G×T×Y    |
|--------|--------------|---------------|-----------|-------------|----------|-------------|----------|
| df     | 55           | 1             | 1         | 55          | 55       | 1           | 55       |
| SR     | 12.47***     | 1923.09***    | 1.51*     | 6.51***     | 0.00     | 5.18***     | 0.00     |
| NDVI   | 0.0230***    | 3.7665***     | 0.0097**  | 0.0113***   | 0.0000   | 0.0478***   | 0.0000   |
| GNDVI  | 0.0151***    | 1.45787***    | 0.00857** | 0.00307***  | 0.00010  | 0.03429***  | 0.00005  |
| EVI    | 0.0401***    | 7.0050***     | 0.0124*   | 0.0265***   | 0.0000   | 0.0581***   | 0.0000   |
| NWI    | 0.000963***  | 0.033858***   | 0.000004  | 0.000151*** | 0.000009 | 0.000025    | 0.000009 |
| NCPI   | 0.00920***   | 1.90720***    | 0.00006   | 0.00512***  | 0.00005  | 0.00572***  | 0.00002  |
| PRI    | 0.001398***  | 0.098843***   | 0.000000  | 0.000509*** | 0.000013 | 0.000387*** | 0.000012 |
| ARI    | 0.0587***    | 13.8834***    | 0.0386*** | 0.0474***   | 0.0008   | 0.0124*     | 0.0008   |
| XES    | 5.23***      | 498.84***     | 0.37      | 1.62***     | 0.00     | 6.63***     | 0.00     |
| SPAD   | 34.74***     | 1882.31***    | 7.58      | 7.48***     | 0.053    | 27.276***   | 0.050    |
| CTD    | 4.064***     | 169.463***    | 0.228     | 0.664***    | 0.000    | 0.947***    | 0.001    |
| DTH    | 273.17***    | 1560.44***    | 34.08***  | 4.34***     | 0.00     | 143.02***   | 0.01     |
| PH     | 758.9***     | 12354.2***    | 74.3*     | 24.4***     | 0.5      | 163.9***    | 0.3      |
| NKS    | 751.0***     | 12723.3***    | 36.6      | 131.8***    | 0.1      | 114.1*      | 0.1      |
| WKS    | 2.1239***    | 21.0269***    | 0.0395    | 0.1253***   | 0.0001   | 0.1262      | 0.0003   |
| HKW    | 5.4692***    | 31.0804***    | 0.2107    | 0.1382***   | 0.0002   | 0.5693*     | 0.0005   |
| BY     | 24.63***     | 1300.90***    | 0.48      | 9.37***     | 0.02     | 1.89        | 0.01     |
| GY     | 9.484***     | 180.453***    | 0.054     | 1.340***    | 0.000    | 0.331       | 0.000    |

\*, \*\*, \*\*\* Statistically significant at  $P \leq 0.05$ , 0.01, 0.001, respectively.



**Table S4.** Pairwise  $F_{ST}$  values among phenotypic clusters.  $F_{ST}$  values in the below diagonal and  $p$  values in the upper diagonal

|           | Cluster 1 | Cluster 2 | Cluster 3 |
|-----------|-----------|-----------|-----------|
| Cluster 1 | –         | 0.001     | 0.001     |
| Cluster 2 | 0.050     | –         | 0.001     |
| Cluster 3 | 0.082     | 0.044     | –         |

**Table S5.** Pairwise  $F_{ST}$  values among subpopulations.  $F_{ST}$  values in the below diagonal and  $p$  values in the upper diagonal

|       | Pop 1 | Pop 2 | Pop 3 |
|-------|-------|-------|-------|
| Pop 1 | –     | 0.001 | 0.001 |
| Pop 2 | 0.057 | –     | 0.151 |
| Pop 3 | 0.055 | 0.017 | –     |
